# Supplementary material for: Effect of Dexamethasone on Nocturnal Oxygenation in Lowlanders With Chronic Obstructive Pulmonary Disease Traveling to 3100 Meters: A Randomized Clinical Trial
Source: PubMed Central journal article supplement (PMC6484579; doi:10.1001/jamanetworkopen.2019.0067), 2019-02-22
Supplement: jamanetwopen-2-e190067-s003.pdf [file jamanetwopen-2-e190067-s003.pdf]

## Data Sharing Statement

Furian. Effect of Dexamethasone on Nocturnal Oxygenation in Lowlanders With Chronic Obstructive Pulmonary Disease Traveling to 3100 Meters. *JAMA Netw Open*. Published February 22, 2019. 10.1001/jamanetworkopen.2019.0067

### Data

**Data available:** No

### Additional Information

**Explanation for why data not available:** Data can be accessed by request.
